# Supplementary material
Source: PubMed Central journal article supplement (PMC2978633)
Supplement: supp_M110.119339_SupplementaryTable2-shifts.pdf [file supp_M110.119339_SupplementaryTable2-shifts.pdf]

Supplementary table S2

Absolute value shifts  $\Delta\delta = |\delta(\text{Pf1}^-) - \delta(\text{Pf1}^+)|$ . Shifts  $\geq 0.4$  are in bold

perturbations are based on the difference between the shifts detected between two Pf1 phage samples prepared from the same batch at the high and low temperatures.

The value  $\delta(\text{Pf1}^+) - \delta(\text{BMBR}) = -0.04 \pm 0.14$

| res #     | name       | atom       | $\Delta\delta$ |           |            |            |             |           |            |            |             |
|-----------|------------|------------|----------------|-----------|------------|------------|-------------|-----------|------------|------------|-------------|
| 1         | GLY        | C          | 0.16           | 16        | GLN        | C          | 0.07        | 30        | LEU        | CA         | 0.20        |
| 1         | GLY        | CA         | 0.00           | 16        | GLN        | CA         | 0.25        | <b>30</b> | <b>LEU</b> | <b>CB</b>  | <b>0.50</b> |
| 2         | VAL        | CA         | 0.24           | 16        | GLN        | CB         | 0.30        | 30        | LEU        | CD1        | 0.00        |
| 2         | VAL        | CB         | 0.20           | 16        | GLN        | CD         | 0.14        | 30        | LEU        | CG         | 0.00        |
| 2         | VAL        | CG1        | 0.27           | <b>16</b> | <b>GLN</b> | <b>CG</b>  | <b>1.03</b> | 31        | VAL        | CA         | 0.18        |
| 2         | VAL        | CG2        | 0.06           | 17        | GLY        | CA         | 0.02        | <b>32</b> | <b>ILE</b> | <b>C</b>   | <b>0.40</b> |
| 3         | ILE        | C          | 0.03           | 18        | ASP        | CA         | 0.05        | <b>32</b> | <b>ILE</b> | <b>CA</b>  | <b>0.43</b> |
| 3         | ILE        | CA         | 0.00           | 18        | ASP        | CB         | 0.10        | <b>32</b> | <b>ILE</b> | <b>CB</b>  | <b>0.82</b> |
| 4         | ASP        | C          | 0.12           | 19        | MET        | C          | 0.11        | <b>32</b> | <b>ILE</b> | <b>CD1</b> | <b>1.75</b> |
| 4         | ASP        | CA         | 0.02           | 19        | MET        | CA         | 0.16        | 32        | ILE        | CG1        | 0.22        |
| 4         | ASP        | CB         | 0.01           | 19        | MET        | CB         | 0.23        | 32        | ILE        | CG2        | 0.21        |
| 5         | THR        | C          | 0.05           | 19        | MET        | CG         | 0.01        | 33        | LEU        | CA         | 0.06        |
| <b>5</b>  | <b>THR</b> | <b>CA</b>  | <b>0.51</b>    | 20        | LYS        | C          | 0.14        | 33        | LEU        | CB         | 0.26        |
| <b>5</b>  | <b>THR</b> | <b>CB</b>  | <b>0.42</b>    | 20        | LYS        | CA         | 0.02        | 33        | LEU        | CD1        | 0.33        |
| <b>5</b>  | <b>THR</b> | <b>CG2</b> | <b>0.56</b>    | 20        | LYS        | CB         | 0.04        | 33        | LEU        | CG         | 0.10        |
| 6         | SER        | CA         | 0.00           | 20        | LYS        | CD         | 0.02        | 34        | ALA        | C          | 0.14        |
| <b>7</b>  | <b>ALA</b> | <b>C</b>   | <b>0.41</b>    | 20        | LYS        | CE         | 0.03        | 34        | ALA        | CA         | 0.03        |
| 7         | ALA        | CA         | 0.12           | 20        | LYS        | CG         | 0.03        | 34        | ALA        | CB         | 0.11        |
| 7         | ALA        | CB         | 0.08           | 21        | ALA        | C          | 0.29        | 35        | VAL        | C          | 0.05        |
| 8         | VAL        | C          | 0.21           | 21        | ALA        | CA         | 0.14        | 35        | VAL        | CA         | 0.25        |
| 8         | VAL        | CA         | 0.02           | 21        | ALA        | CB         | 0.04        | 35        | VAL        | CB         | 0.22        |
| 8         | VAL        | CB         | 0.15           | 22        | ILE        | C          | 0.23        | <b>35</b> | <b>VAL</b> | <b>CG1</b> | <b>0.68</b> |
| 8         | VAL        | CG1        | 0.19           | 22        | ILE        | CA         | 0.14        | 35        | VAL        | CG2        | 0.19        |
| <b>8</b>  | <b>VAL</b> | <b>CG2</b> | <b>0.41</b>    | <b>22</b> | <b>ILE</b> | <b>CB</b>  | <b>0.51</b> | 36        | ALA        | C          | 0.17        |
| 9         | GLU        | C          | 0.03           | 22        | ILE        | CD1        | 0.05        | 36        | ALA        | CA         | 0.07        |
| 9         | GLU        | CA         | 0.01           | 22        | ILE        | CG1        | 0.36        | 36        | ALA        | CB         | 0.22        |
| 9         | GLU        | CB         | 0.17           | 22        | ILE        | CG2        | 0.17        | 38        | LEU        | CA         | 0.01        |
| 9         | GLU        | CD         | 0.17           | 25        | TYR        | C          | 0.04        | <b>38</b> | <b>LEU</b> | <b>CB</b>  | <b>0.63</b> |
| 9         | GLU        | CG         | 0.24           | <b>25</b> | <b>TYR</b> | <b>CA</b>  | <b>0.69</b> | <b>38</b> | <b>LEU</b> | <b>CD1</b> | <b>1.00</b> |
| 10        | SER        | C          | 0.16           | 25        | TYR        | CB         | 0.01        | <b>38</b> | <b>LEU</b> | <b>CD2</b> | <b>0.40</b> |
| 10        | SER        | CA         | 0.12           | 25        | TYR        | CD1        | 0.16        | 38        | LEU        | CG         | 0.04        |
| 10        | SER        | CB         | 0.13           | 25        | TYR        | CD2        | 0.16        | 39        | ILE        | CA         | 0.10        |
| 11        | ALA        | C          | 0.38           | 25        | TYR        | CE1        | 0.18        | 39        | ILE        | CB         | 0.10        |
| 11        | ALA        | CA         | 0.02           | 25        | TYR        | CE2        | 0.18        | 39        | ILE        | CD1        | 0.15        |
| 11        | ALA        | CB         | 0.08           | 25        | TYR        | CG         | 0.08        | <b>39</b> | <b>ILE</b> | <b>CG1</b> | <b>1.14</b> |
| 12        | ILE        | C          | 0.20           | 25        | TYR        | CZ         | 0.16        | 39        | ILE        | CG2        | 0.30        |
| <b>12</b> | <b>ILE</b> | <b>CA</b>  | <b>0.72</b>    | 26        | ILE        | C          | 0.01        | 40        | TYR        | C          | 0.34        |
| 12        | ILE        | CB         | 0.38           | 26        | ILE        | CA         | 0.07        | 40        | TYR        | CA         | 0.06        |
| <b>12</b> | <b>ILE</b> | <b>CD1</b> | <b>0.44</b>    | <b>26</b> | <b>ILE</b> | <b>CB</b>  | <b>0.46</b> | 40        | TYR        | CB         | 0.22        |
| 12        | ILE        | CG1        | 0.25           | 26        | ILE        | CD1        | 0.26        | 41        | SER        | C          | 0.38        |
| 13        | THR        | C          | 0.15           | <b>26</b> | <b>ILE</b> | <b>CG1</b> | <b>0.74</b> | 41        | SER        | CA         | 0.01        |
| 13        | THR        | CA         | 0.04           | 26        | ILE        | CG2        | 0.13        | 42        | MET        | CA         | 0.22        |
| 13        | THR        | CB         | 0.01           | 27        | VAL        | C          | 0.16        | 42        | MET        | CB         | 0.26        |
| 13        | THR        | CG2        | 0.24           | 27        | VAL        | CA         | 0.06        | 43        | LEU        | CA         | 0.16        |
| 14        | ASP        | C          | 0.11           | 27        | VAL        | CB         | 0.26        | 43        | LEU        | CB         | 0.04        |
| 14        | ASP        | CA         | 0.02           | 27        | VAL        | CG1        | 0.08        | 43        | LEU        | CD2        | 0.23        |
| 14        | ASP        | CB         | 0.04           | 27        | VAL        | CG2        | 0.01        | 43        | LEU        | CG         | 0.03        |
| 14        | ASP        | CG         | 0.09           | 29        | ALA        | C          | 0.00        | 44        | ARG        | CZ         | 0.05        |
|           |            |            |                | 29        | ALA        | CA         | 0.25        | 46        | ALA        | C          | 0.36        |
|           |            |            |                | <b>29</b> | <b>ALA</b> | <b>CB</b>  | <b>1.14</b> | 46        | ALA        | CA         | 0.33        |
|           |            |            |                |           |            |            |             | 46        | ALA        | CB         | 0.07        |
